# Supplementary material for: Comparative Study of Two Different TiO2 Film Sensors on Response to H2 under UV Light and Room Temperature
Source: MDPI journal article supplement (doi:10.3390/s16081249), 2016-08-08
Supplement: s1 [file s1]

# Supplementary Materials: Comparative Study of Two Different TiO<sub>2</sub> Film Sensors on Response to H<sub>2</sub> under UV Light and Room Temperature

Xiaoying Peng, Zhongming Wang, Pan Huang, Xun Chen, Xianzhi Fu and Wenxin Dai

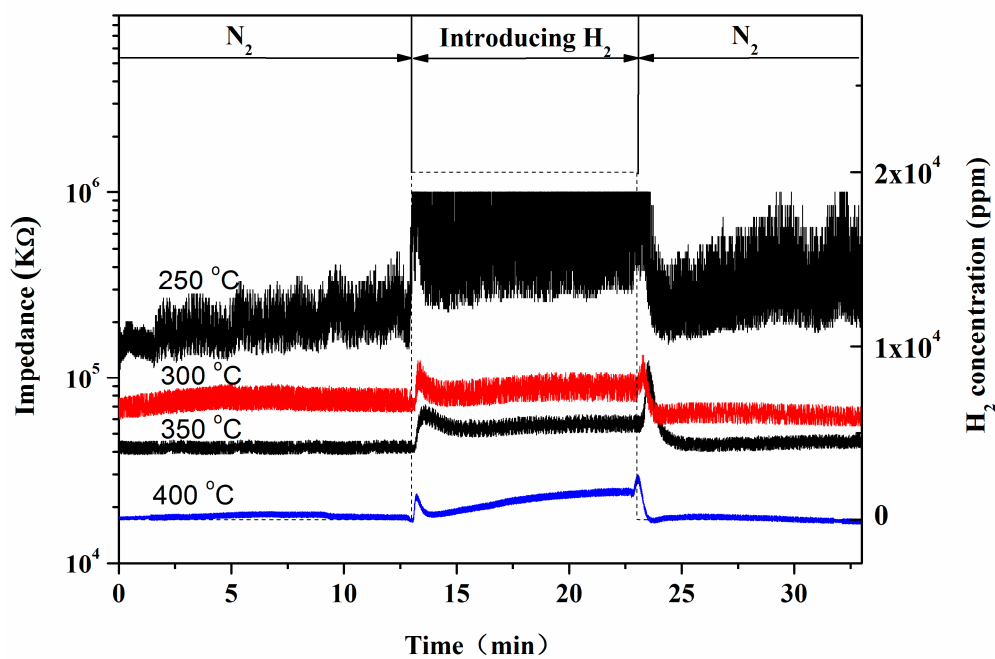

**Figure S1.** Gas sensing process to H<sub>2</sub> in N<sub>2</sub> atmosphere at different temperatures without UV light over TiO<sub>2</sub>-I sample. The solid curves denote the impedance module of samples as function of time, and the dotted line denotes the concentration of H<sub>2</sub> during the testing process. However, the testing process at 450 °C could not be performed due to the temperature limit of the chamber.
